# Supplementary material for: Shape-memory poly(arylene ether ketone)s with tunable transition temperatures and their composite actuators capable of electric-triggered deformation
Source: Royal Society of Chemistry journal article supplement (doi:10.1039/c9tc05475h), 2019-11-17
Supplement: c9tc05475h1.pdf [file c9tc05475h1.pdf]

Supporting Information

## Shape memory poly(arylene ether ketone)s with tunable transition temperatures and their composite actuators capable of electric-triggered deformation

Shuai Yang<sup>a</sup>, Yang He<sup>a</sup>, Yanju Liu<sup>b</sup> and Jinsong Leng<sup>a\*</sup>

<sup>a</sup>National Key Laboratory of Science and Technology on Advanced Composites in Special Environments, Harbin Institute of Technology, Harbin, P. R. China

<sup>b</sup>Department of Astronautic Science and Mechanics, Harbin Institute of Technology, Harbin, P. R. China

Correspondence to: Jinsong Leng (E-mail: [lengjs@hit.edu.cn](mailto:lengjs@hit.edu.cn))

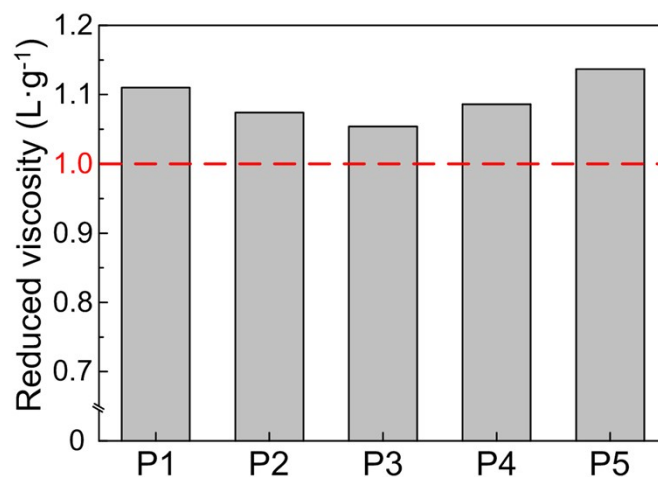

Fig. S1 Reduced viscosity of prepared PAEK solutions

Video S1 The whole shape recovery behavior of P3 film at the temperature of 126 °C (T<sub>g</sub> +10 °C)

Video S2 The whole shape recovery behavior of P1C3 film at the voltage of 25 V
